# Supplementary material for: Effects of Mining Activities on the Release of Heavy Metals (HMs) in a Typical Mountain Headwater Region, the Qinghai-Tibet Plateau in China
Source: MDPI journal article supplement (doi:10.3390/ijerph15091987), 2018-09-12
Supplement: s1 [file s1]

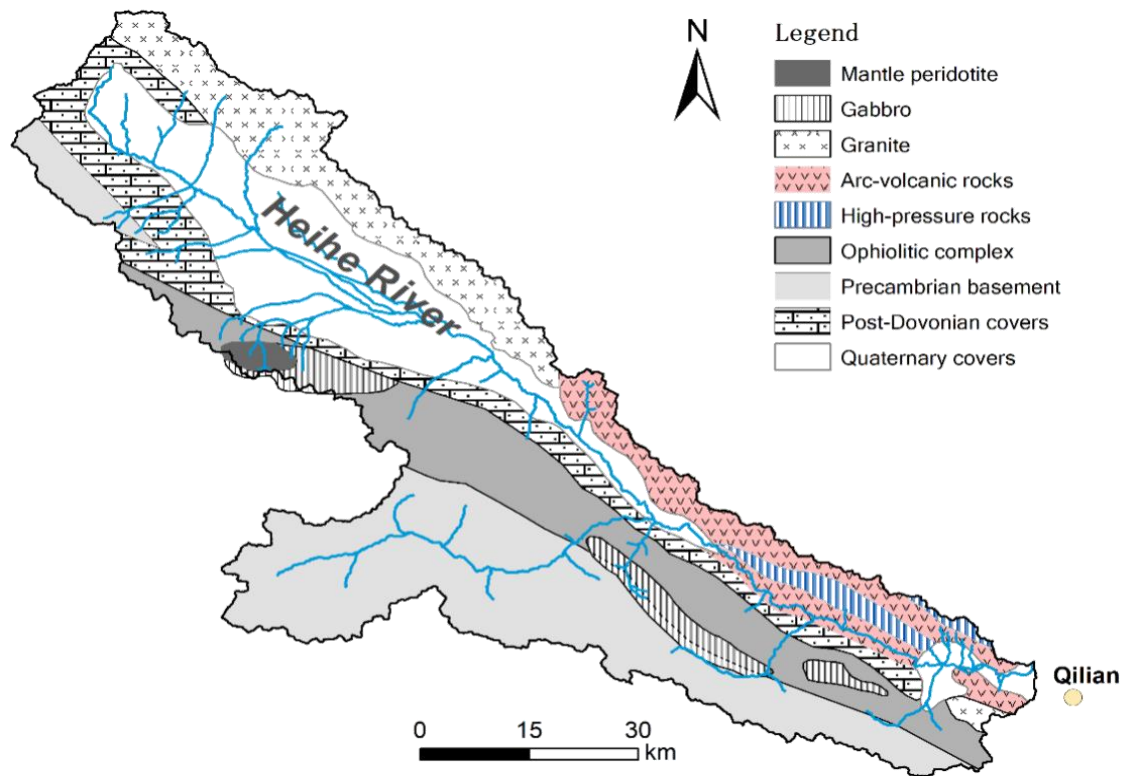

**Figure S1.** Geological map of the headwater regions of Heihe River Basin.

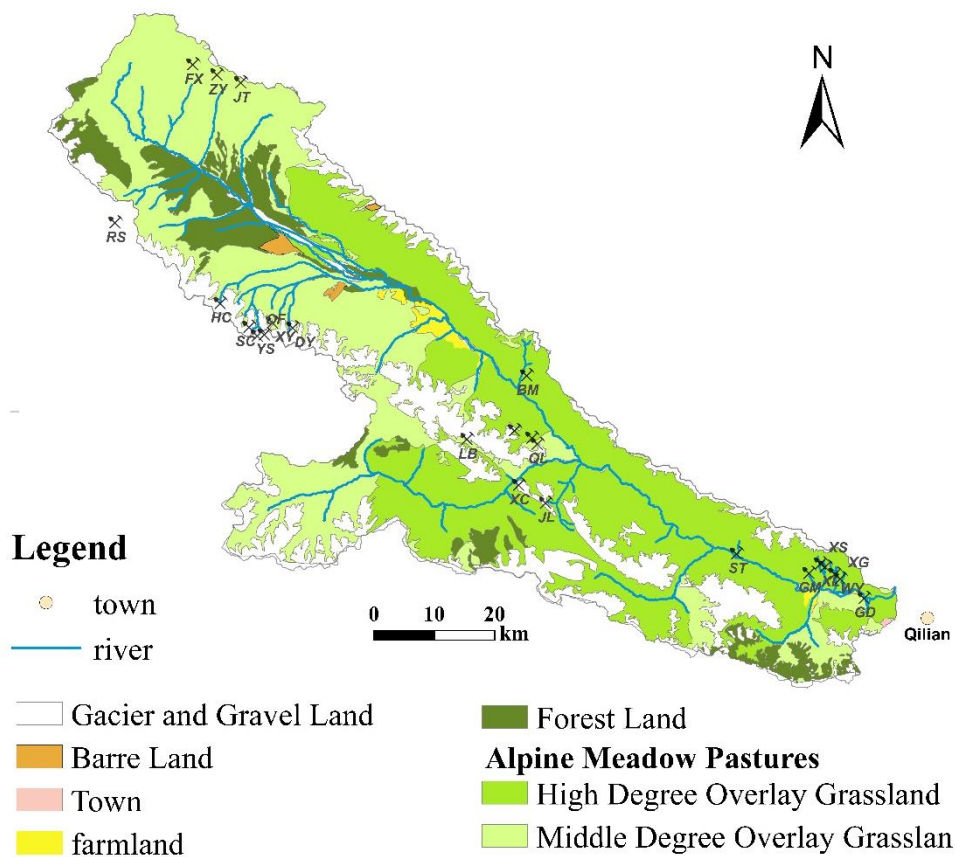

**Figure S2.** The Land Use Coverage of the headwater region of the Heihe River Basin.
